# Supplementary material
Source: publisher figshare collection journal article supplement (https://acs.figshare.com/ndownloader/files/18678959)
Supplement: Supplementary file 1 [file 18678959 › info.xml]

<presentation>
	<article>
		<title>Evidence for Orientational Order in Nanothreads Derived from Thiophene</title>
		<doi>10.1021/acs.jpclett.9b02546</doi>
		<copyright>American Chemical Society</copyright>
		<narrator>Arani Biswas</narrator>
		<contact>Arani Biswas, Timothy Strobel</contact>
		<contact-email>aqb5771@psu.edu, tstrobel@carnegiescience.edu</contact-email>
		<author-list>
			<author>Timothy A. Strobel</author>
		</author-list>
	</article>
	<slides height-width-ratio=".75">
		<slide audio-time="20">
			<subtitle/>
		</slide>
		<slide audio-time="28">
			<subtitle/>
		</slide>
		<slide audio-time="53">
			<subtitle/>
		</slide>
		<slide audio-time="35">
			<subtitle/>
		</slide>
		<slide audio-time="63">
			<subtitle/>
		</slide>
		<slide audio-time="82">
			<subtitle/>
		</slide>
		<slide audio-time="36">
			<subtitle/>
		</slide>
		<slide audio-time="69">
			<subtitle/>
		</slide>
	</slides>
	<audio duration="386"/>
</presentation>
